# Supplementary figures and images for: Docosahexaenoic Acid-Loaded Nanostructured Lipid Carriers for the Treatment of Peri-Implantitis in Rats
Source: MDPI journal article supplement (doi:10.3390/ijms24031872), 2023-01-18

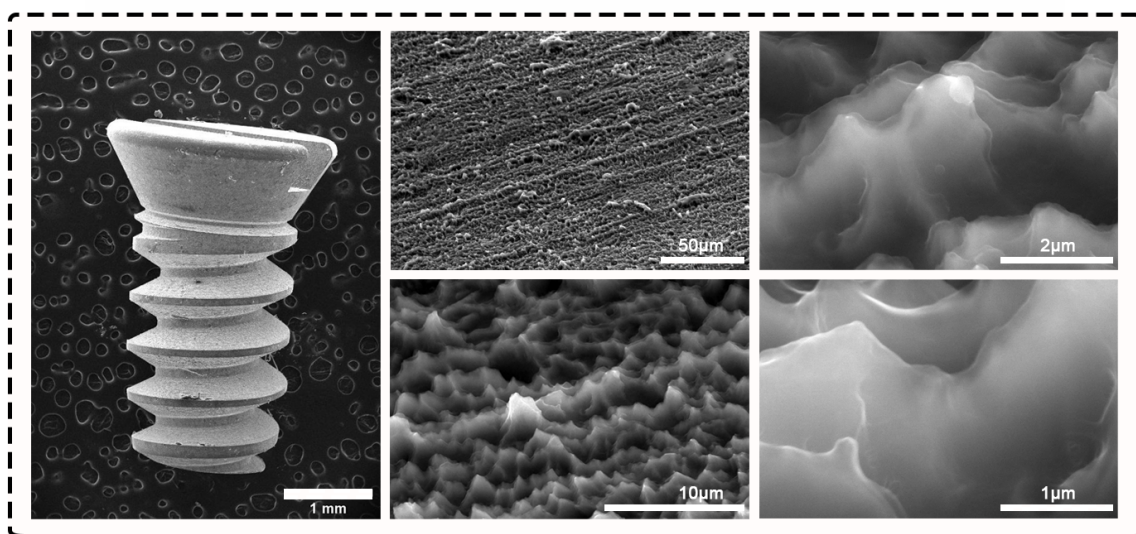

**Figure S1.** Morphological characteristics of the mini-implant.

Supplement: s1 [file s1]
